# Supplementary material for: Elevated CO2 alleviates the negative impact of heat stress on wheat physiology but not on grain yield
Source: PubMed Central journal article supplement (PMC6859723; doi:10.1093/jxb/erz386), 2019-08-24
Supplement: erz386_suppl_supplementary_tables_s1-s3_figures_s1-s5.pdf [file erz386_suppl_supplementary_tables_s1-s3_figures_s1-s5.pdf]

**Table S1 Response of leaf gas exchange parameters to elevated CO<sub>2</sub> and heat stress:** Summary of leaf gas exchange parameters measured at different time points for wheat cultivar Scout grown at ambient CO<sub>2</sub> (aCO<sub>2</sub>) or elevated CO<sub>2</sub> (eCO<sub>2</sub>) and exposed (H) or not exposed (control) to 5-day heat stress (HS) at the anthesis stage. Values are means  $\pm$  SE (n= 9-10).

| Parameter                                                                   | Growth           | Measurement |                 | T1 (13WAP)      | HS Cycle (15WAP) |                 |                 | T2 (17WAP)      |                 |
|-----------------------------------------------------------------------------|------------------|-------------|-----------------|-----------------|------------------|-----------------|-----------------|-----------------|-----------------|
|                                                                             |                  | Temp        | CO <sub>2</sub> | Control         | Before (Control) | During (HS)     | After (HS)      | Recovery (HS)   | Control         |
| A<br>( $\mu\text{mol m}^{-2}\text{s}^{-1}$ )                                | aCO <sub>2</sub> | 25          | 400             | 31 $\pm$ 0.3    | 28.3 $\pm$ 0.8   | 23.7 $\pm$ 0.8  | 14.2 $\pm$ 1.2  | 13.4 $\pm$ 2.6  | 23.1 $\pm$ 1.2  |
|                                                                             |                  | 25          | 650             | 44.2 $\pm$ 0.7  | 38.1 $\pm$ 1.1   | 30 $\pm$ 1.1    | 20.2 $\pm$ 1.4  | 19.1 $\pm$ 3.3  | 31.8 $\pm$ 1.9  |
|                                                                             |                  | 35          | 400             | 26.4 $\pm$ 0.4  | 25.4 $\pm$ 0.7   | 21.7 $\pm$ 0.8  | 15.6 $\pm$ 1.1  | 11.2 $\pm$ 2    | 18.6 $\pm$ 1.9  |
|                                                                             |                  | 35          | 650             | 42.3 $\pm$ 0.8  | 39.8 $\pm$ 0.8   | 33.1 $\pm$ 1.1  | 25.9 $\pm$ 1.8  | 19.8 $\pm$ 2.9  | 28.7 $\pm$ 2.6  |
|                                                                             | eCO <sub>2</sub> | 25          | 400             | 27.4 $\pm$ 0.7  | 27.1 $\pm$ 0.8   | 28 $\pm$ 1.1    | 18.7 $\pm$ 1    | 22.9 $\pm$ 1    | 22 $\pm$ 0.9    |
|                                                                             |                  | 25          | 650             | 38.6 $\pm$ 1.3  | 40.5 $\pm$ 1.1   | 35.4 $\pm$ 1.2  | 27.1 $\pm$ 1.4  | 34.6 $\pm$ 1.8  | 31.6 $\pm$ 1    |
|                                                                             |                  | 35          | 400             | 23.3 $\pm$ 0.8  | 24 $\pm$ 0.7     | 24.9 $\pm$ 1.2  | 19.2 $\pm$ 1.1  | 17.4 $\pm$ 2.1  | 13.6 $\pm$ 1.9  |
|                                                                             |                  | 35          | 650             | 36.8 $\pm$ 0.9  | 38.9 $\pm$ 1     | 38.5 $\pm$ 1.8  | 30 $\pm$ 2.2    | 29.8 $\pm$ 3.2  | 22.7 $\pm$ 4    |
| Rd<br>( $\mu\text{mol m}^{-2}\text{s}^{-1}$ )                               | aCO <sub>2</sub> | 25          | 400             | -2.4 $\pm$ 0.2  | -1.8 $\pm$ 0.1   | -2.5 $\pm$ 0.1  | -2.4 $\pm$ 0.1  | -1.9 $\pm$ 0.3  | -1.8 $\pm$ 0.1  |
|                                                                             |                  | 35          | 400             | -4.0 $\pm$ 0.2  | -2.9 $\pm$ 0.2   | -3.7 $\pm$ 0.1  | -3 $\pm$ 0.2    | -2.6 $\pm$ 0.2  | -2.8 $\pm$ 0.2  |
|                                                                             | eCO <sub>2</sub> | 25          | 400             | -1.9 $\pm$ 0.2  | -2.6 $\pm$ 0.2   | -2.3 $\pm$ 0.1  | -2.9 $\pm$ 0.1  | -2.3 $\pm$ 0.2  | -2.1 $\pm$ 0.1  |
|                                                                             |                  | 35          | 400             | -3.1 $\pm$ 0.3  | -3.7 $\pm$ 0.1   | -3.9 $\pm$ 0.2  | -4.5 $\pm$ 0.2  |                 | -3.3 $\pm$ 0.2  |
| g <sub>s</sub><br>( $\text{mol m}^{-2}\text{s}^{-1}$ )                      | aCO <sub>2</sub> | 25          | 400             | 0.42 $\pm$ 0.02 | 0.41 $\pm$ 0.03  | 0.54 $\pm$ 0.02 | 0.22 $\pm$ 0.02 | 0.26 $\pm$ 0.03 | 0.38 $\pm$ 0.01 |
|                                                                             |                  | 25          | 650             | 0.42 $\pm$ 0.02 | 0.4 $\pm$ 0.03   | 0.54 $\pm$ 0.02 | 0.23 $\pm$ 0.02 | 0.25 $\pm$ 0.02 | 0.41 $\pm$ 0.02 |
|                                                                             |                  | 35          | 400             | 0.29 $\pm$ 0.01 | 0.4 $\pm$ 0.03   | 0.49 $\pm$ 0.03 | 0.41 $\pm$ 0.03 | 0.26 $\pm$ 0.03 | 0.23 $\pm$ 0.03 |
|                                                                             |                  | 35          | 650             | 0.29 $\pm$ 0.01 | 0.39 $\pm$ 0.02  | 0.47 $\pm$ 0.03 | 0.44 $\pm$ 0.04 | 0.25 $\pm$ 0.02 | 0.23 $\pm$ 0.03 |
|                                                                             | eCO <sub>2</sub> | 25          | 400             | 0.4 $\pm$ 0.02  | 0.47 $\pm$ 0.03  | 0.66 $\pm$ 0.04 | 0.31 $\pm$ 0.02 | 0.39 $\pm$ 0.04 | 0.41 $\pm$ 0.04 |
|                                                                             |                  | 25          | 650             | 0.38 $\pm$ 0.02 | 0.49 $\pm$ 0.02  | 0.63 $\pm$ 0.03 | 0.3 $\pm$ 0.02  | 0.41 $\pm$ 0.02 | 0.43 $\pm$ 0.03 |
|                                                                             |                  | 35          | 400             | 0.26 $\pm$ 0.02 | 0.43 $\pm$ 0.02  | 0.54 $\pm$ 0.03 | 0.36 $\pm$ 0.02 | 0.24 $\pm$ 0.04 | 0.19 $\pm$ 0.04 |
|                                                                             |                  | 35          | 650             | 0.27 $\pm$ 0.02 | 0.43 $\pm$ 0.02  | 0.53 $\pm$ 0.03 | 0.35 $\pm$ 0.04 | 0.24 $\pm$ 0.04 | 0.19 $\pm$ 0.05 |
| PWUE<br>(A <sub>sat</sub> /g <sub>s</sub> )<br>( $\mu\text{mol mol}^{-1}$ ) | aCO <sub>2</sub> | 25          | 400             | 74 $\pm$ 3      | 72 $\pm$ 4       | 44 $\pm$ 2      | 66 $\pm$ 3      | 51 $\pm$ 5      | 61 $\pm$ 2      |
|                                                                             |                  | 25          | 650             | 107 $\pm$ 6     | 98 $\pm$ 6       | 56 $\pm$ 3      | 89 $\pm$ 3      | 74 $\pm$ 7      | 77 $\pm$ 4      |
|                                                                             |                  | 35          | 400             | 92 $\pm$ 4      | 65 $\pm$ 3       | 46 $\pm$ 3      | 39 $\pm$ 3      | 43 $\pm$ 6      | 83 $\pm$ 10     |
|                                                                             |                  | 35          | 650             | 146 $\pm$ 6     | 105 $\pm$ 5      | 72 $\pm$ 5      | 61 $\pm$ 4      | 78 $\pm$ 9      | 127 $\pm$ 7     |
|                                                                             | eCO <sub>2</sub> | 25          | 400             | 69 $\pm$ 2      | 58 $\pm$ 2       | 43 $\pm$ 2      | 62 $\pm$ 4      | 61 $\pm$ 6      | 55 $\pm$ 4      |
|                                                                             |                  | 25          | 650             | 101 $\pm$ 3     | 84 $\pm$ 3       | 57 $\pm$ 3      | 95 $\pm$ 7      | 85 $\pm$ 3      | 75 $\pm$ 5      |
|                                                                             |                  | 35          | 400             | 91 $\pm$ 6      | 57 $\pm$ 2       | 48 $\pm$ 3      | 54 $\pm$ 4      | 75 $\pm$ 6      | 75 $\pm$ 11     |
|                                                                             |                  | 35          | 650             | 139 $\pm$ 10    | 93 $\pm$ 4       | 75 $\pm$ 5      | 99 $\pm$ 15     | 132 $\pm$ 14    | 134 $\pm$ 25    |
| Fv'/Fm'                                                                     | aCO <sub>2</sub> | 25          | 400             | 0.48 $\pm$ 0.02 | 0.5 $\pm$ 0.01   | 0.47 $\pm$ 0.01 | 0.41 $\pm$ 0.01 | 0.33 $\pm$ 0.04 | 0.46 $\pm$ 0.02 |
|                                                                             |                  | 35          | 400             | 0.42 $\pm$ 0.01 | 0.45 $\pm$ 0.01  | 0.42 $\pm$ 0.02 | 0.35 $\pm$ 0.01 | 0.31 $\pm$ 0.04 | 0.4 $\pm$ 0.01  |
|                                                                             | eCO <sub>2</sub> | 25          | 400             | 0.48 $\pm$ 0.03 | 0.52 $\pm$ 0.01  | 0.47 $\pm$ 0.01 | 0.45 $\pm$ 0.01 | 0.46 $\pm$ 0.01 | 0.47 $\pm$ 0.01 |
|                                                                             |                  | 35          | 400             | 0.41 $\pm$ 0.01 | 0.47 $\pm$ 0.01  | 0.41 $\pm$ 0.01 | 0.41 $\pm$ 0.01 | 0.42 $\pm$ 0.01 | 0.37 $\pm$ 0.04 |
| Fv/Fm                                                                       | aCO <sub>2</sub> | 25          | 400             | 0.82 $\pm$ 0.01 | 0.8 $\pm$ 0.01   | 0.75 $\pm$ 0.01 | 0.75 $\pm$ 0.01 | 0.73 $\pm$ 0.02 | 0.76 $\pm$ 0.01 |
|                                                                             |                  | 35          | 400             | 0.79 $\pm$ 0.01 | 0.8 $\pm$ 0      | 0.73 $\pm$ 0.02 | 0.72 $\pm$ 0.01 | 0.72 $\pm$ 0.04 | 0.78 $\pm$ 0.01 |
|                                                                             | eCO <sub>2</sub> | 25          | 400             | 0.8 $\pm$ 0.02  | 0.82 $\pm$ 0     | 0.79 $\pm$ 0.01 | 0.76 $\pm$ 0.01 | 0.78 $\pm$ 0.01 | 0.78 $\pm$ 0.01 |
|                                                                             |                  | 35          | 400             | 0.79 $\pm$ 0.01 | 0.81 $\pm$ 0     | 0.75 $\pm$ 0.01 | 0.76 $\pm$ 0.01 |                 | 0.74 $\pm$ 0.04 |

**Table S2 Response of plant dry mass (DM) and morphological parameters to elevated CO<sub>2</sub> and heat stress:** Summary of plant biomass and morphological parameters measured at different time points for what cultivar Scout grown at ambient CO<sub>2</sub> (aCO<sub>2</sub>) or elevated CO<sub>2</sub> (eCO<sub>2</sub>), with some plants exposed to heat stress (HS) at the anthesis stage. Values are means  $\pm$  SE (n= 9-10).

| Parameter<br>(Mean plant <sup>-1</sup> ) | Time                   | T1(13WAP)      | T2 (Anthesis, 17 WAP) |                | T3 (Maturity, 25 |             |
|------------------------------------------|------------------------|----------------|-----------------------|----------------|------------------|-------------|
|                                          | Heat Stress            | Control        | Control               | HS             | Control          | HS          |
|                                          | Growth CO <sub>2</sub> |                |                       |                |                  |             |
| Tiller Number                            | aCO <sub>2</sub>       | 9.2 $\pm$ 0.6  | 10.9 $\pm$ 0.5        | 16.3 $\pm$ 0.7 |                  |             |
|                                          | eCO <sub>2</sub>       | 12.9 $\pm$ 0.7 | 12.3 $\pm$ 0.8        | 28.3 $\pm$ 1.6 |                  |             |
| Leaf Area (cm <sup>2</sup> )             | aCO <sub>2</sub>       | 338 $\pm$ 27   | 338 $\pm$ 40          | 296 $\pm$ 47   |                  |             |
|                                          | eCO <sub>2</sub>       | 680 $\pm$ 59   | 441 $\pm$ 58          | 650 $\pm$ 55   |                  |             |
| Leaf Number (n)                          | aCO <sub>2</sub>       | 33.8 $\pm$ 2.6 | 26.9 $\pm$ 0.8        | 37 $\pm$ 3.1   |                  |             |
|                                          | eCO <sub>2</sub>       | 49.5 $\pm$ 2.8 | 27.6 $\pm$ 2.2        | 66.7 $\pm$ 4.4 |                  |             |
| Leaf Size (cm <sup>2</sup> )             | aCO <sub>2</sub>       | 27 $\pm$ 7     | 32 $\pm$ 5            | 38 $\pm$ 5     |                  |             |
|                                          | eCO <sub>2</sub>       | 24 $\pm$ 2     | 24 $\pm$ 3            | 42 $\pm$ 5     |                  |             |
| Leaf Mass Area                           | aCO <sub>2</sub>       | 58 $\pm$ 1     | 56 $\pm$ 2            | 68 $\pm$ 1     |                  |             |
|                                          | eCO <sub>2</sub>       | 52 $\pm$ 2     | 48 $\pm$ 3            | 60 $\pm$ 1     |                  |             |
| Leaf DM (g)                              | aCO <sub>2</sub>       | 1.9 $\pm$ 0.1  | 1.8 $\pm$ 0.1         | 2.0 $\pm$ 0.3  |                  |             |
|                                          | eCO <sub>2</sub>       | 3.5 $\pm$ 0.2  | 1.8 $\pm$ 0.1         | 3.9 $\pm$ 0.3  |                  |             |
| Stem DM (g)                              | aCO <sub>2</sub>       | 3.9 $\pm$ 0.1  | 9.6 $\pm$ 0.3         | 9.3 $\pm$ 0.7  |                  |             |
|                                          | eCO <sub>2</sub>       | 8.5 $\pm$ 0.6  | 11.4 $\pm$ 0.8        | 17.1 $\pm$ 0.7 |                  |             |
| Root DM (g)                              | aCO <sub>2</sub>       | 1.4 $\pm$ 0.2  | 1.6 $\pm$ 0.1         | 1.9 $\pm$ 0.2  | 0.6 $\pm$ 0.1    | 2 $\pm$ 0.3 |
|                                          | eCO <sub>2</sub>       | 2.0 $\pm$ 0.2  | 2.4 $\pm$ 0.4         | 3.8 $\pm$ 0.8  | 0.6 $\pm$ 0.1    | 1.2 $\pm$   |
| Shoot DM (g)                             | aCO <sub>2</sub>       | 8.1 $\pm$ 0.3  | 32.9 $\pm$ 1.3        | 22.1 $\pm$ 0.8 | 9.3 $\pm$ 0.4    | 10.3 $\pm$  |
|                                          | eCO <sub>2</sub>       | 16.8 $\pm$ 1.1 | 41.2 $\pm$ 1.9        | 35.5 $\pm$ 0.8 | 12.7 $\pm$ 0.7   | 18.9 $\pm$  |
| Total DM (g)                             | aCO <sub>2</sub>       | 9.5 $\pm$ 0.4  | 34.5 $\pm$ 1.5        | 24.1 $\pm$ 1.0 | 33.7 $\pm$ 1.5   | 31.4 $\pm$  |
|                                          | eCO <sub>2</sub>       | 18.8 $\pm$ 1.3 | 43.6 $\pm$ 2.2        | 39.3 $\pm$ 0.9 | 45.5 $\pm$ 2.2   | 48.8 $\pm$  |
| Ear Number                               | aCO <sub>2</sub>       |                |                       |                | 10.2 $\pm$ 0.3   | 16.7 $\pm$  |
|                                          | eCO <sub>2</sub>       |                |                       |                | 12.5 $\pm$ 0.4   | 22.6 $\pm$  |
| Grains Per Ear                           | aCO <sub>2</sub>       |                |                       |                | 41 $\pm$ 1       | 21 $\pm$ 1  |
|                                          | eCO <sub>2</sub>       |                |                       |                | 41 $\pm$ 1       | 17 $\pm$ 1  |
| Total Grain Number                       | aCO <sub>2</sub>       |                |                       |                | 415 $\pm$ 21     | 352 $\pm$   |
|                                          | eCO <sub>2</sub>       |                |                       |                | 511 $\pm$ 20     | 384 $\pm$   |
| Single Grain Weight                      | aCO <sub>2</sub>       |                |                       |                | 44 $\pm$ 1       | 32 $\pm$ 1  |
|                                          | eCO <sub>2</sub>       |                |                       |                | 46 $\pm$ 1       | 35 $\pm$ 1  |
| Grain yield (g)                          | aCO <sub>2</sub>       |                |                       |                | 18.1 $\pm$ 0.9   | 11.2 $\pm$  |
|                                          | eCO <sub>2</sub>       |                |                       |                | 23.5 $\pm$ 1.1   | 13.7 $\pm$  |
| Harvest Index                            | aCO <sub>2</sub>       |                |                       |                | 0.536 $\pm$      | 0.357 $\pm$ |
|                                          | eCO <sub>2</sub>       |                |                       |                | 0.518 $\pm$      | 0.281 $\pm$ |

**Table S3 Temperature response of mesophyll conductance ( $g_m$ ) in Scout:** Summary of mesophyll conductance measured at five leaf temperatures using concurrent gas exchange and stable carbon isotope measurements. Values are means  $\pm$  SE (n=4)

| <b>Leaf Temperature<br/>(°C)</b> | <b>Mesophyll Conductance<br/>(<math>g_m</math>, mol m<sup>-2</sup>s<sup>-1</sup>)</b> |
|----------------------------------|---------------------------------------------------------------------------------------|
| <b>15</b>                        | 0.232 $\pm$ 0.005                                                                     |
| <b>20</b>                        | 0.286 $\pm$ 0.01                                                                      |
| <b>25</b>                        | 0.309 $\pm$ 0.008                                                                     |
| <b>30</b>                        | 0.279 $\pm$ 0.007                                                                     |
| <b>35</b>                        | 0.292 $\pm$ 0.01                                                                      |

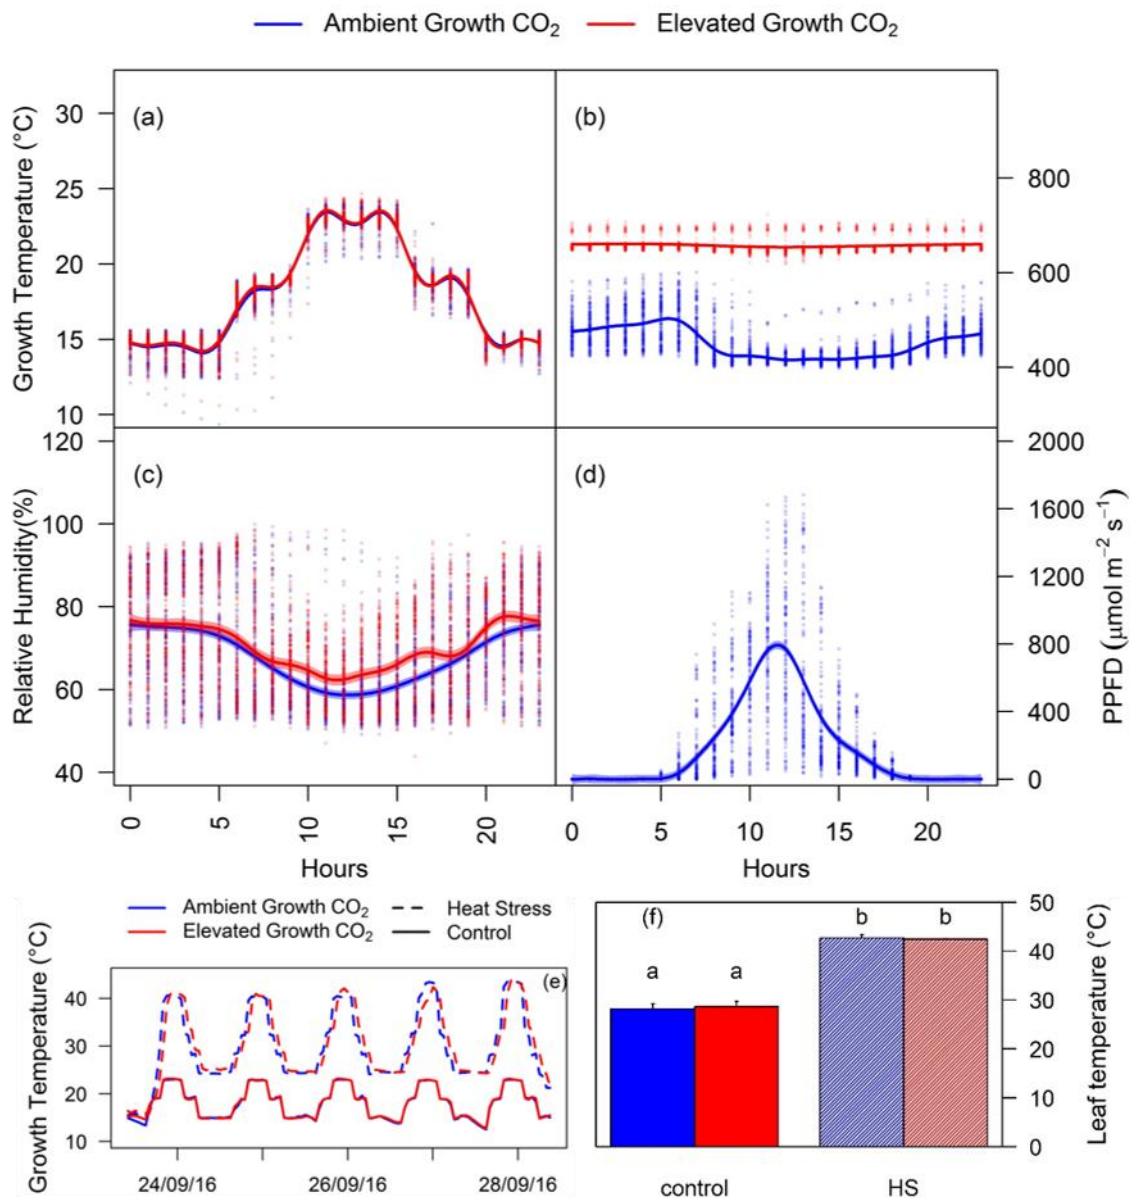

**Figure S1 Glasshouse growth conditions and heat stress cycle**

Daily averages of growth temperature (a), CO<sub>2</sub> (b), relative humidity (c) and PPFD (d). In panels, a, b, c and d solid lines represent the growth averages, while the faint data points show recorded observations. Lower panel (e) illustrates the 5-day heat stress cycle at the anthesis stage. Growth air temperatures recorded in control and heat stress chambers during heat stress are depicted using solid and dotted lines, respectively. Bar plot of means for leaf temperature (f) of 2-way analysis of variance (anova). Values represent means  $\pm$  standard error (n=5). Bars sharing the same letter in the individual panel are not significantly different according to Tukey's HSD test at the 5% level. Ambient and elevated CO<sub>2</sub> treatments are depicted in blue and red, respectively.

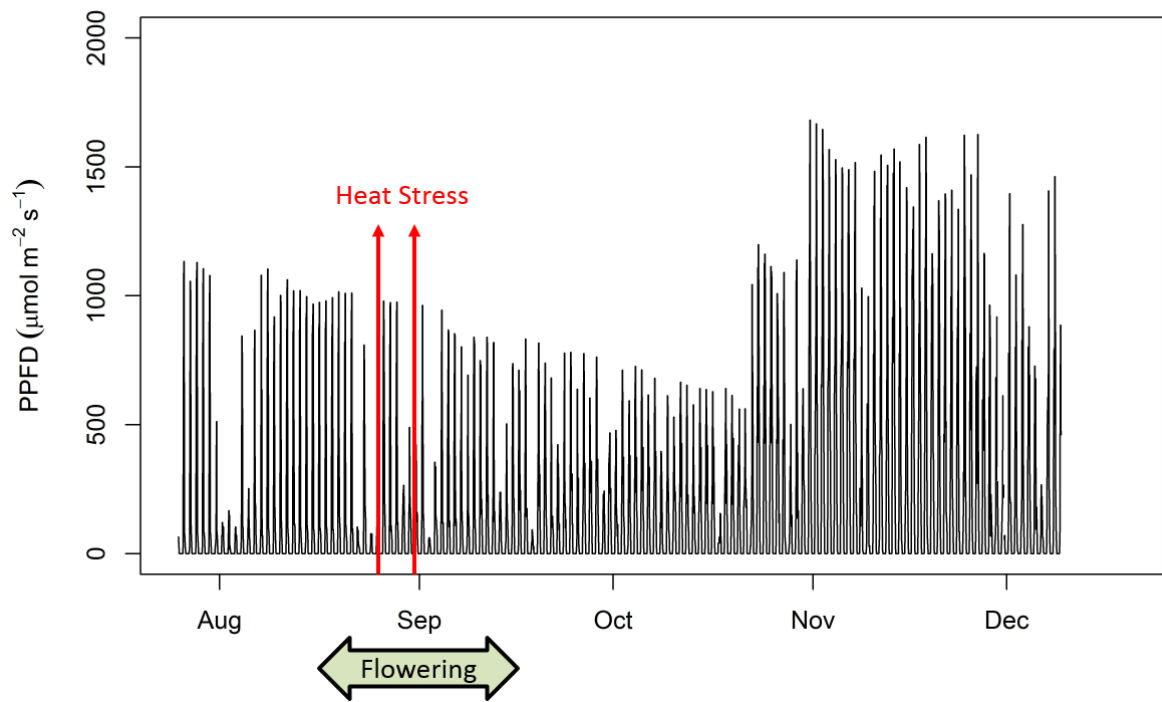

**Figure S2 Radiation over time**

Radiation over time depicting the radiation load during the experiment highlighted for anthesis and heat stress.

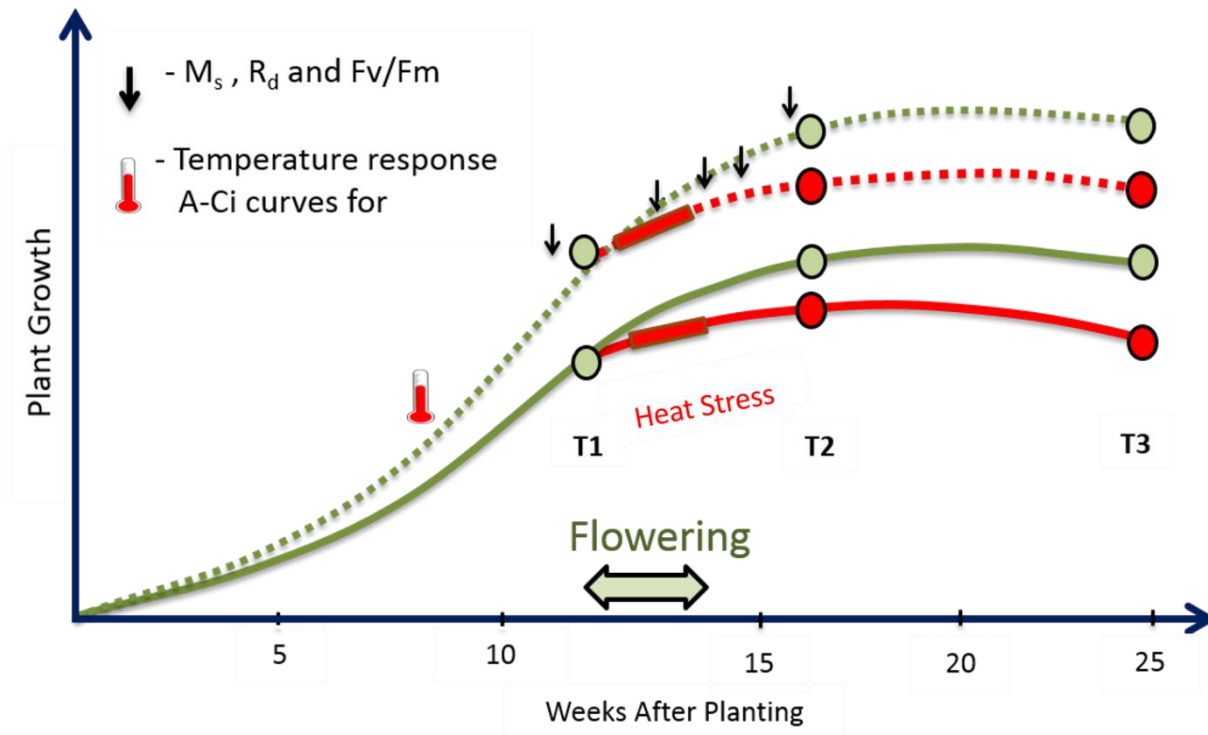

**Figure S3 Experimental design depicting plant growth plotted over time showing harvesting at 3-time points (T1, T2 and T3) across the wheat life cycle till maturity, timing of heat stress and measurements**

The circles represent harvest of 10 plants at corresponding time point. Green circles on the green solid and dotted lines represent control plants grown at ambient and elevated CO<sub>2</sub> respectively. Red rectangles point to timing and duration of the heat stress (HS) at anthesis stage. The red circles on red solid and dotted lines represent plants subjected to heat stress and grown at ambient and elevated CO<sub>2</sub> respectively. Thermometer symbol represents timing of temperature response measurements.

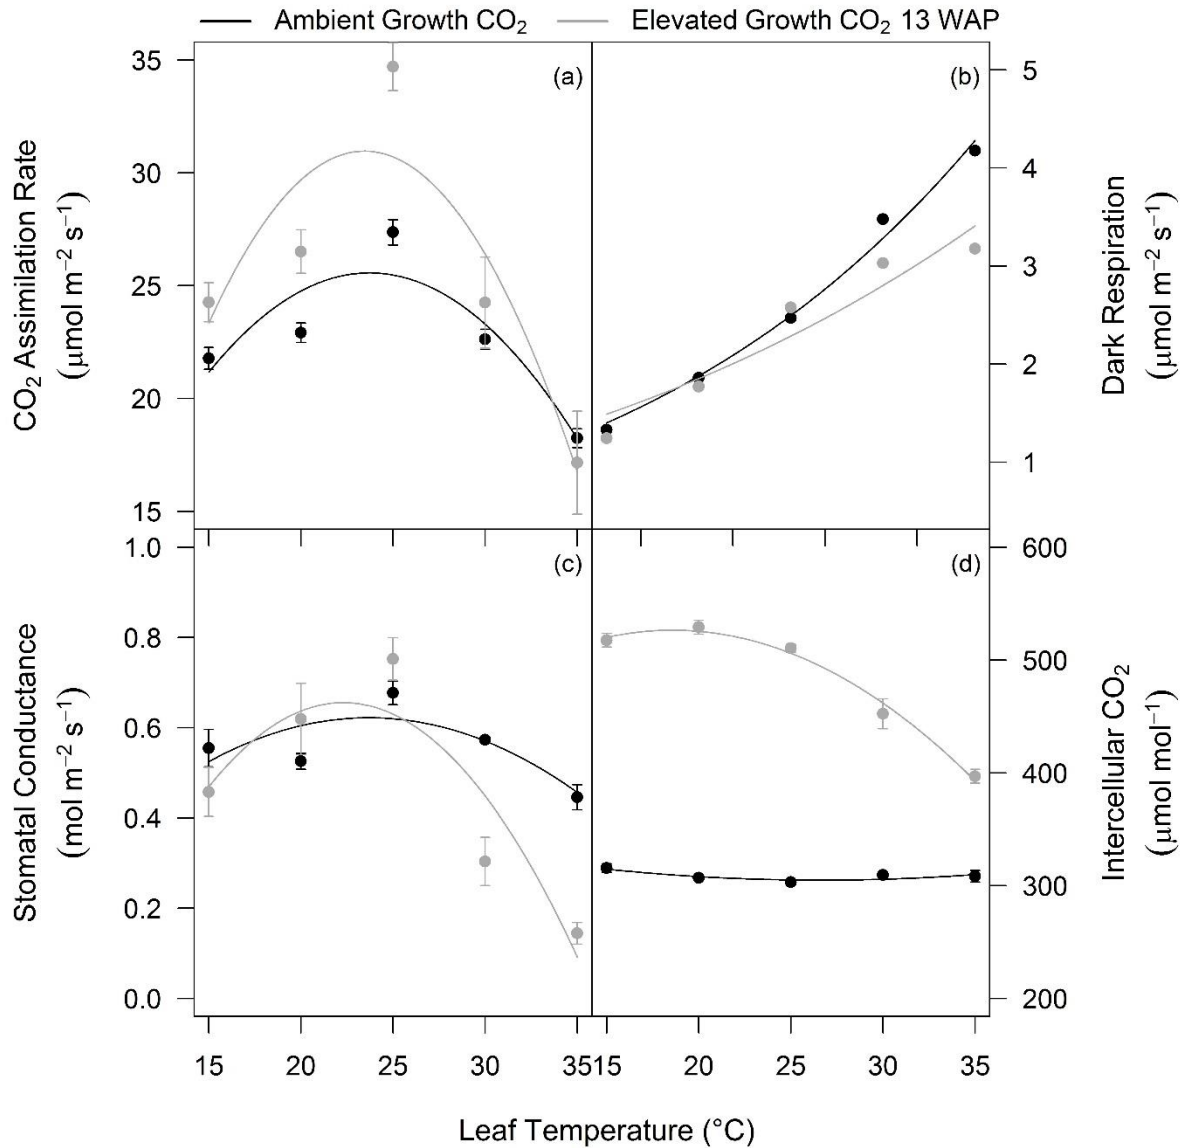

**Figure S4 Temperature response of spot gas exchange parameters measured thirteen weeks after planting (WAP)**

CO<sub>2</sub> assimilation rate (a), dark respiration (b), stomatal conductance (c) and intercellular CO<sub>2</sub> (d) measured at growth CO<sub>2</sub> and five leaf temperatures (15, 20, 25, 30 and 35 °C) in wheat cultivar Scout. Values are mean ± SE (n=6). Ambient and elevated CO<sub>2</sub> grown plants are depicted in black and grey, respectively.

| Heat Stress →     | Control                                                                                  | HS                                                                                        |                                                                                            |
|-------------------|------------------------------------------------------------------------------------------|-------------------------------------------------------------------------------------------|--------------------------------------------------------------------------------------------|
| CO <sub>2</sub> ↓ |                                                                                          | Old tillers                                                                               | New tillers                                                                                |
| Ambient           | (a)<br> | (b)<br> | (c)<br> |
| Elevated          | (d)<br> | (e)<br>  | (f)<br> |

**Figure S5 Response of grain size and morphology to heat stress at the final harvest**

Heat stress effect on grain size and morphology from old tillers and additional late tillers developed after HS under ambient (a, b, c) and elevated CO<sub>2</sub> (d, e, f).
